# Supplementary material for: Different effects of water molecules on CO oxidation with different reaction mechanisms
Source: Royal Society of Chemistry journal article supplement (doi:10.1039/c8cp00035b), 2018-01-01
Supplement: c8cp00035b1.pdf [file c8cp00035b1.pdf]

## Supporting Information

### **Different Effects of Water Molecules on CO Oxidation in Different Reaction Mechanisms**

Shan Ping Liu, Ming Zhao, Guo En Sun\*, Wang Gao\* and Qing Jiang

**Table S1.** Reaction barriers and reactive energies of the corresponding reactions for the OCOO pathway with PBE method.

| System                                                        |             | Pt(221) |       | Pt(221)/7H <sub>2</sub> O |       |
|---------------------------------------------------------------|-------------|---------|-------|---------------------------|-------|
|                                                               |             | $E_a$   | $E_r$ | $E_a$                     | $E_r$ |
| Reactions                                                     | Energy (eV) |         |       |                           |       |
| $\text{CO}^* + \text{O}_2^* \rightarrow \text{OCOO}^*$        |             | 1.82    | 1.31  | 1.00                      | 0.46  |
| $\text{OCOO}^* \rightarrow \text{CO}_2 + \text{O}^*$          |             | \       | -1.97 | \                         | -1.50 |
| $\text{O}^* + \text{CO} \rightarrow \text{O}^* + \text{CO}^*$ |             | \       | -1.82 | \                         | -1.76 |
| $\text{O}^* + \text{CO}^* \rightarrow \text{CO}_2^*$          |             | 0.93    | -0.92 | 0.62                      | -0.88 |

**Table S2.** Reaction barriers and reactive energies of the corresponding reactions for the OCOO pathway with PBE+TSSurf method.

| System                                                            |             | Pt(221) |       | Pt(221)/7H <sub>2</sub> O |       |
|-------------------------------------------------------------------|-------------|---------|-------|---------------------------|-------|
|                                                                   |             | $E_a$   | $E_r$ | $E_a$                     | $E_r$ |
| Reactions                                                         | Energy (eV) |         |       |                           |       |
| $\text{CO}^* + \text{O}_2^* \rightarrow \text{OCOO}^*$            |             | 1.79    | 1.45  | 1.11                      | 0.62  |
| $\text{OCOO}^* \rightarrow \text{CO}_2^* + \text{O}^*$            |             | 1.76    | -2.66 | 1.27                      | -2.69 |
| $\text{CO}_2^* + \text{O}^* \rightarrow \text{CO}_2 + \text{O}^*$ |             | \       | 0.74  | \                         | 0.60  |
| $\text{O}^* + \text{CO} \rightarrow \text{O}^* + \text{CO}^*$     |             | \       | -2.53 | \                         | -2.32 |
| $\text{O}^* + \text{CO}^* \rightarrow \text{CO}_2^*$              |             | 0.93    | -0.85 | 0.65                      | -1.16 |

**Table S3.** Reaction barriers and reactive energies of the corresponding reactions for the O<sub>2</sub> dissociation pathway with PBE+TSSurf method.

| System                                                                                  |             | Pt(221) |       | Pt(221)/7H <sub>2</sub> O |       |
|-----------------------------------------------------------------------------------------|-------------|---------|-------|---------------------------|-------|
|                                                                                         |             | $E_a$   | $E_r$ | $E_a$                     | $E_r$ |
| Reactions                                                                               | Energy (eV) |         |       |                           |       |
| $\text{O}_2^* \rightarrow \text{O}^* + \text{O}^*$                                      |             | 1.25    | -0.85 | 0.99                      | -0.88 |
| $\text{O}^* + \text{O}^* + \text{CO} \rightarrow \text{O}^* + \text{O}^* + \text{CO}^*$ |             | \       | -2.13 | \                         | -2.55 |
| $\text{O}^* + \text{O}^* + \text{CO}^* \rightarrow \text{O}^* + \text{CO}_2^*$          |             | 1.47    | -1.06 | 1.09                      | -0.88 |
| $\text{O}^* + \text{CO}_2^* \rightarrow \text{O}^* + \text{CO}_2$                       |             | \       | 0.89  | \                         | 0.58  |
| $\text{O}^* + \text{CO} \rightarrow \text{O}^* + \text{CO}^*$                           |             | \       | -2.36 | \                         | -2.42 |
| $\text{O}^* + \text{CO}^* \rightarrow \text{CO}_2^*$                                    |             | 0.98    | -1.14 | 0.81                      | -1.23 |

**Table S4.** Reaction barriers and reactive energies of the  $\text{CO}^*+\text{O}^*\rightarrow\text{CO}_2^*$  process for the different systems with different reactants concentration by using PBE method.

| System<br>Concentration Energy (eV) |  | Pt(221) |       | Pt(221)/7H <sub>2</sub> O |       |
|-------------------------------------|--|---------|-------|---------------------------|-------|
|                                     |  | $E_a$   | $E_r$ | $E_a$                     | $E_r$ |
| CO*+ O*                             |  | 0.93    | -0.65 | 0.62                      | -1.25 |
| 2CO*+ O*                            |  | 0.88    | -0.76 | 0.63                      | -1.35 |
| CO*+2O*                             |  | 0.97    | -1.06 | 0.76                      | -1.62 |
| 2CO*+2O*                            |  | 0.66    | -1.53 | 0.57                      | -1.83 |

**Table S5.** Reaction barriers and reactive energies of the  $\text{CO}^*+\text{O}^*\rightarrow\text{CO}_2^*$  process for the different systems with different reactants concentration by using PBE+TSsurf method.

| System<br>Concentration Energy (eV) |  | Pt(221) |       | Pt(221)/7H <sub>2</sub> O |       |
|-------------------------------------|--|---------|-------|---------------------------|-------|
|                                     |  | $E_a$   | $E_r$ | $E_a$                     | $E_r$ |
| CO*+ O*                             |  | 0.94    | -0.62 | 0.63                      | -1.18 |
| 2CO*+ O*                            |  | 0.87    | -0.74 | 0.64                      | -1.28 |
| CO*+2O*                             |  | 1.04    | -0.98 | 0.75                      | -1.47 |
| 2CO*+2O*                            |  | 0.66    | -1.46 | 0.62                      | -1.66 |

**Table S6.** Reaction barriers and reactive energies of the corresponding reactions for the CO+OH pathway with PBE method.

| System<br>Reactions Energy (eV)                      |  | Pt(221) |       | Pt(221)/7H <sub>2</sub> O |       |
|------------------------------------------------------|--|---------|-------|---------------------------|-------|
|                                                      |  | $E_a$   | $E_r$ | $E_a$                     | $E_r$ |
| CO*+OH* $\rightarrow$ COOH*- <i>cis</i>              |  | 0.56    | 0.19  | 0.55                      | 0.18  |
| COOH*- <i>cis</i> $\rightarrow$ COOH*- <i>tra</i>    |  | 0.42    | -0.16 | 0.56                      | 0.04  |
| COOH*- <i>tra</i> $\rightarrow$ CO <sub>2</sub> *+H* |  | 0.74    | 0.47  | 0.76                      | 0.52  |

**Table S7.** Reaction barriers and reactive energies of the corresponding reactions for the CO+OH pathway with PBE+TSsurf method.

| System<br>Reactions Energy (eV)                      |  | Pt(221) |       | Pt(221)/7H <sub>2</sub> O |       |
|------------------------------------------------------|--|---------|-------|---------------------------|-------|
|                                                      |  | $E_a$   | $E_r$ | $E_a$                     | $E_r$ |
| CO*+OH* $\rightarrow$ COOH*- <i>cis</i>              |  | 0.56    | 0.18  | 0.57                      | 0.18  |
| COOH*- <i>cis</i> $\rightarrow$ COOH*- <i>tra</i>    |  | 0.39    | -0.19 | 0.62                      | 0.07  |
| COOH*- <i>tra</i> $\rightarrow$ CO <sub>2</sub> *+H* |  | 0.77    | 0.44  | 1.00                      | 0.19  |

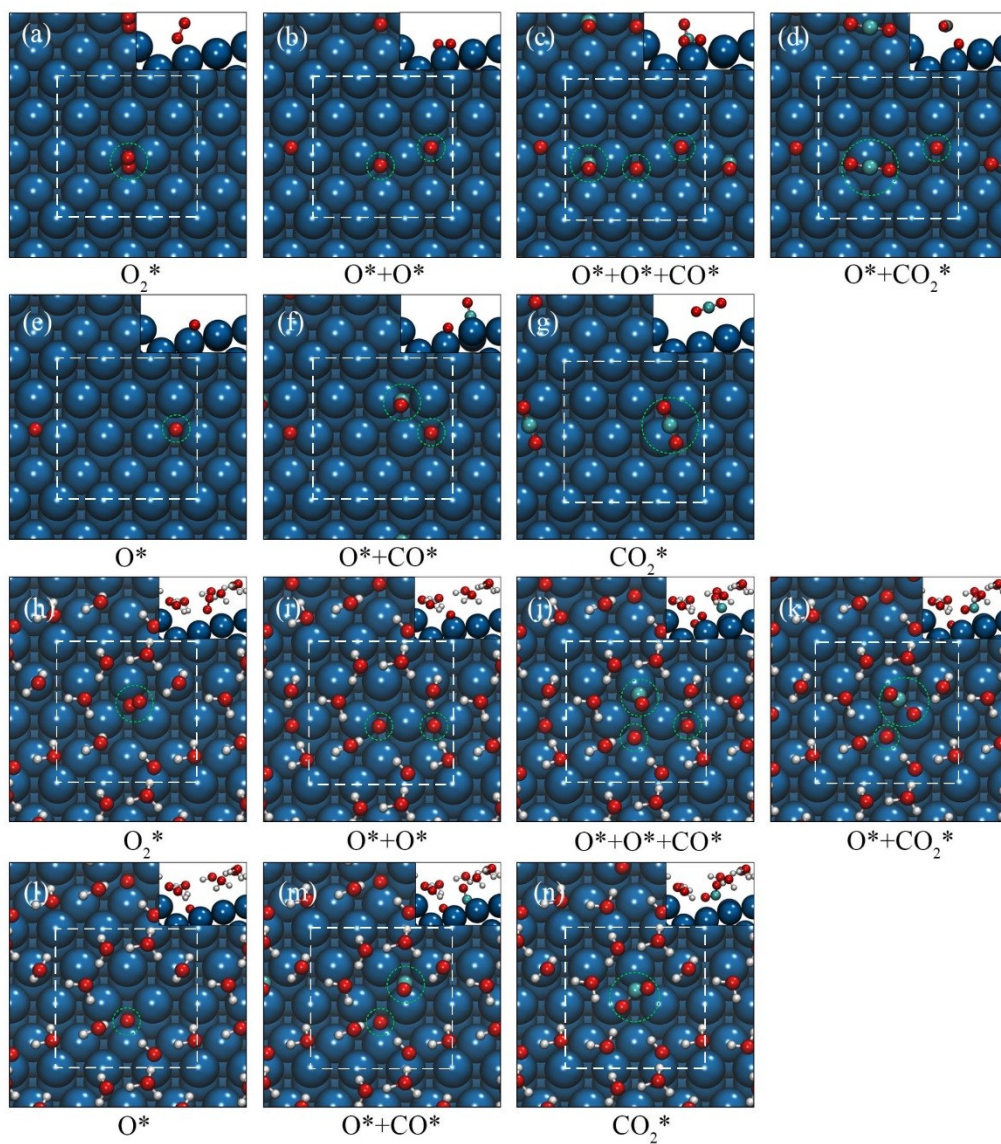

**Figure S1.** Configurations of the intermediates for  $O_2$  dissociation pathway on Pt(221) (a-g) and Pt(221)/7H<sub>2</sub>O (h-n). All the intermediates are marked out with green circles.
